**1 Integrative multi-omics identifies high risk Multiple Myeloma**  
**2 subgroup associated with significant DNA loss and dysregulated DNA**  
**3 repair and cell cycle pathways**

4

5 María Ortiz-Estévez<sup>1†</sup>, Mehmet Samur<sup>2†</sup>, Fadi Towfic<sup>3†</sup>, Erin Flynt<sup>4</sup>, Nicholas Stong<sup>4</sup>, In Sock  
6 Jang<sup>3</sup>, Kai Wang<sup>3</sup>, Paresh Vyas<sup>5</sup>, Nikhil Munshi<sup>6</sup>, Herve Avet-Loiseau<sup>7,8</sup>, Matthew W. B. Trotter<sup>1</sup>,  
7 Gareth J. Morgan<sup>9</sup>, Brian A. Walker<sup>10</sup> and Anjan Thakurta<sup>4\*</sup>

8 1 BMS Center for Innovation and Translational Research Europe (CITRE), A Bristol Myers  
9 Squibb Company, Sevilla, Spain

10 2 Dana-Farber Cancer Institute, Harvard TH Chan School of Public Health, Boston, MA, USA

11 3 Bristol Myers Squibb, San Diego, CA, USA

12 4 Bristol Myers Squibb, Summit, NJ, USA

13 5 Molecular Haematology Unit, BRC Haematology Theme, Oxford Biomedical Research Centre,  
14 Oxford Centre for Haematology, Weatherall Institute of Molecular Medicine, Radcliffe  
15 Department of Medicine, University of Oxford, Oxford, UK

16 6 Dana-Farber Cancer Institute, Harvard Medical School, Boston, MA, USA

17 7 IUC-Oncopole and Cancer Research Center of Toulouse, France

18 8 INSERM U1037, Toulouse, France

19 9 New York University, New York, NY, USA

20 10 Melvin and Bren Simon Comprehensive Cancer Center, Indiana University, Indianapolis, IN,

21 USA

22

23 †These authors contributed equally to this work and are co-lead authors.

24

25 Short title: A molecular high-risk myeloma disease subgroup

26

27 \*To whom correspondence should be addressed:

28 Anjan Thakurta, BMS, 181 Passaic Ave, Summit, NJ 07901.

29 email: [anjan.thakurta@bms.com](mailto:anjan.thakurta@bms.com)

30

31

32 Body: 3464 words

33 Figures/Tables: 7 figures / 0 tables

34 Supplementary: 10 figures / 6 tables / 1 file

35 References: 55

36

37 **Abstract**

38 Despite significant therapeutic advances in improving lives of Multiple Myeloma (MM) patients, it  
39 remains mostly incurable, with patients ultimately becoming refractory to therapies. MM is a  
40 genetically heterogeneous disease and therapeutic resistance is driven by a complex interplay  
41 of disease pathobiology and mechanisms of drug resistance. We applied a multi-omics strategy  
42 using tumor-derived gene expression, single nucleotide variant, copy number variant, and  
43 structural variant profiles to investigate molecular subgroups in 514 newly diagnosed MM  
44 (NDMM) samples and identified 12 molecularly defined MM subgroups (MDMS1-12) with  
45 distinct genomic and transcriptomic features.

46 Our integrative approach let us identify ndMM subgroups with transversal profiles to previously  
47 described ones, based on single data types, which shows the impact of this approach for  
48 disease stratification. One key novel subgroup is our MDMS8, associated with poor clinical  
49 outcome [median overall survival, 38 months (global log-rank  $pval < 1 \times 10^{-6}$ )], which uniquely  
50 presents a broad genomic loss (>9% of entire genome, t.test  $pval < 1e-5$ ) driving dysregulation of  
51 various transcriptional programs affecting DNA repair and cell cycle/mitotic processes. This  
52 subgroup was validated on multiple independent datasets, and a master regulator analyses  
53 identified transcription factors controlling MDMS8 transcriptomic profile, including CKS1B and  
54 PRKDC among others, which are regulators of the DNA repair and cell cycle pathways.

55 **Statement of Significance:** Using multi-omics unsupervised clustering we discovered a new high-  
56 risk multiple myeloma patient segment. We linked its diverse genetic markers (previously known,  
57 and new including genomic loss) to transcriptional dysregulation (cell cycle, DNA repair and DNA  
58 damage) and identified master regulators that control these key biological pathways.

## 59 Introduction

60 Multiple Myeloma (MM) patients have complex genetic heterogeneity in the tumor that  
61 includes structural variants (SVs) such as immunoglobulin heavy chain (*IgH*) translocations,  
62 single nucleotide variants (SNVs) in oncogenes and tumor suppressor genes, and  
63 genomic/chromosomal copy number variants (CNVs), as well as transcriptomic changes (1, 2).  
64 A comprehensive molecular classification of the disease based on all these types of data may  
65 shed light into how the combinations of these genetic and transcriptomic features define or  
66 contribute to intra-tumoral heterogeneity, therapeutic response and/or resistance and eventual  
67 relapse.

68 The MM community has devoted significant effort toward identifying molecular genetic  
69 features to diagnose MM patients, especially focused on patients with poor prognosis. For this  
70 reason, they have relied upon supervised analyses to identify molecular features associated  
71 with poor clinical outcome that may not necessarily identify biological sub-types of disease, nor  
72 be the features driving aggressive biology of the tumor. Various signatures have been  
73 previously proposed to identify high-risk patients, including UAMS70/80/17 (3), EMC92 (4),  
74 IFM15 (5), chromosome instability signature (6), centrosome index signature (7) and  
75 proliferation index (8). Some of these signatures were combined with disease stages (9) or  
76 expression of long intergenic non-coding RNAs (10) to improve their prognostic utility. Recently,  
77 we identified high-risk disease subgroups based on DNA features combining amp1q (CNV=4 or  
78 more) plus International Staging System 3 (ISS) or biallelic inactivation of *TP53* (deletion and  
79 mutation) (11); and clonal status of del17p (high-risk del17p) (12). To date, some genomic  
80 biomarkers including del17p, gain1q, t(4;14) or t(14;16), and mutations in *TP53*, in combination  
81 with clinical characteristics have been used in the clinic or clinical trials for prognosis (13, 14).

82 Previous efforts to stratify MM based on gene expression (GE) data identified 7  
83 molecular subgroups with distinct transcriptomic profiles (15-17). Some of these subgroups  
84 were linked to genomic abnormalities (including translocations (SVs) or hyperdiploidy (HY)),  
85 while others such as the proliferative group (PR) apparently was driven mainly by transcriptional  
86 pathways (15). More recently, Laganà et al identified gene modules, which were subsequently  
87 associated with genomic and clinical features (17). Mutational signatures that are independent  
88 of previously defined prognostic markers have also been used to stratify MM patients (18) and  
89 stratification of MM patients based on CNVs has demonstrated some association with outcome  
90 (19).

91 Integrative clustering analyses across multiple data types from large, well annotated  
92 datasets, have identified novel biological subgroups in solid tumors and acute myeloid leukemia  
93 (20-23); showing the impact of data integration in disease stratification. Such an analysis,  
94 however, is yet to be reported in MM. As part of the Myeloma Genome Project (MGP) (19), here  
95 we present a large-scale multi-omics analysis of newly diagnosed MM (NDMM).

96 Our work identified 12 disease subgroups using an integrative multi-omics approach  
97 combining GE, SV, CNV, and SNV features (Figure 1A), where clinical covariates, such as  
98 outcome data, were not included to define genomic subgroups independently from known  
99 clinical features. We further explored the molecular features and clinical associations of the 12  
100 biological subsets and focused on a subgroup (MDMS8) which showed the worst prognosis  
101 across the entire patient cohort (Figure 1B). MDMS8 main characteristic is a significant (>8%)  
102 genomic loss associated with dysregulated DNA repair and cell cycle/mitotic related  
103 transcriptional programs. The integrative nature of MDMS8 comes up on its transversal profile  
104 to specific known biomarkers of high risk (including 1q amplification, del17p and t(4;14) (Figure  
105 2 and Supplementary Figure S4A-E), and to patient subgroups previously defined based only on  
106 gene expression (such as the proliferative, the MMSET and the MAF subgroups (15-17))

107 (Figure 6). Master regulator analysis (24, 25) identified 7 genes controlling MDMS8  
108 transcriptional program, including E2F2, CKS1B and PRKDC, which seem to control  
109 dysregulation of DNA repair and cell cycle pathways putatively for sustaining the genome loss.  
110 We further validated MDMS8 in independent NDMM and relapsed/refractory MM (RRMM)  
111 datasets demonstrating the reproducible persistence and prevalence of this segment across  
112 patient cohorts.

## 113 **Results**

### 114 **Integrative Clustering Analysis Identifies Twelve Molecularly Defined Disease Subgroups** 115 **in Myeloma**

116 We analyzed genomic and transcriptomic data from 514 NDMM patients enrolled in the  
117 Multiple Myeloma Research Foundation (MMRF) CoMMpass study (NCT0145429, version  
118 IA17). The subset of the samples selected was based on the intersection of the various datasets  
119 (GE, CNVs, SNVs, SVs and clinical information), and patient characteristics are presented in  
120 Supplementary Table S1. Demographics, clinical data, treatment information and data  
121 processing steps have been published previously (11, 19).

122 Two alternative multi-omics integrative analysis methods were applied to the complete  
123 dataset: iCluster+ (26) and Cluster of Clusters Analysis (COCA) (27). Each clustering method  
124 was run one thousand times with re-sampling of features and samples to ensure robustness  
125 (Supplementary Figure S1). While iCluster+ defines clusters based on integrated, simultaneous  
126 analysis across the data types; COCA uses a two-step analysis, first clustering on each single  
127 data type and then grouping the results into a final set of clusters. Results of the two clustering  
128 methods overlapped but were not identical (Supplementary Table S2). In our dataset, iCluster+  
129 identified 12 subgroups (in >40% of the iterations, followed by 11 clusters selected <30%)  
130 compared to 14 subgroups (>30% of the iterations, followed by 12 clusters selected <20%)

131 identified by COCA. Consensus across iterations, defined by prevalence of same samples being  
132 clustered together, was higher in iCluster+ (>70% iCluster+ vs <65% COCA) thus, the iCluster+  
133 output was selected for further analysis.

134 Twelve molecularly defined MM subgroups (MDMS) were identified by iCluster+  
135 (Supplementary File 1), with sizes ranging from 5% to 12% of the total cohort of 514 (Figure 1B  
136 and Supplementary Figure S2). These included six HY subgroups (MDMS1-6), characterized by  
137 gains (CNV=3 or more) of chromosomes 3, 5, 9, 15 and 19, and six non-HY subgroups  
138 (MDMS7-12) (Figures 1B and 2; Supplementary Table S3). Within the HY group, MDMS1-2-3  
139 share several molecular characteristics, including gain of Chr11 (gain11) and over-expression of  
140 *PAPD7*. MDMS1 is differentiated from MDMS3 and MDMS5 by deletion of 8p22.1 (del8p22.1),  
141 mutation of *RB1*, over-expression of *NSDHL* and up-regulated cell cycle and checkpoints  
142 signaling pathways. MDMS2 shows a deep down-regulation of cell cycle related pathways, and  
143 this characteristic is shared with MDMS6. MDMS3 is enriched in *FAM46C* and *NRAS* mutation  
144 and up-regulation of the interferon pathway. MDMS4 and MDMS5 have no gain of Chr11, but  
145 MDMS5 only is enriched in gain of Chr3 and has significant del13q and mutations in *ARID2*,  
146 *EGR1* and *NF1* genes. MDMS6 is defined by gain20q11, gain11q23.3, down-regulation of  
147 *MED11*, and down-regulation of DNA repair, cell cycle and checkpoints pathways (Figures 1B  
148 and 2; Supplementary Table S3).

149 Among the non-HY subgroups, MDMS7, MDMS11 and MDMS12 are significantly  
150 associated with t(11;14) (Figures 1B and 2; Supplementary Table S3). MDMS7 is also enriched  
151 in gain19q13 and up-regulated interferon pathways. Both MDMS8 and MDMS9 have t(14;16)  
152 and t(4;14) patients, however, due to the low prevalence of t(14;16) patients in the study it does  
153 not appear to be the driver of any of these groups (Supplementary Figure S3). MDMS8 is also  
154 significantly enriched in gain1q; del1p, del16q, del17p. In addition to t(14;16), MDMS9 shows a  
155 significant enrichment of gain1q, del13q14.3, del16q24.1, and mutations in *ATM*, *DIS3*, *TP53*

156 and *TRAF3*. MDMS10 is defined by del13q14.3 and mutations in *DIS3* and *PRKD2*; while also  
157 presenting the highest significant enrichment for t(4;14) and *FGFR3* mutations compared to the  
158 other disease subgroups. The pattern of mutations in MDMS10 aligns with the activation of  
159 MEK/ERK signaling pathway (28). MDMS11 presents down-regulation of interferon related  
160 pathways (in contrast to MDMS7) and reduced expression of *FBXW2* and *KIF4B*. MDMS12,  
161 mainly driven by t(11;14), is also enriched in *CCND1*, *IRF4* and *NRAS* mutations, over-  
162 expression of *CCND1* and low expression of *CCND2* (Figures 1B and 2; Supplementary Table  
163 S3).

#### 164 **Identification and Validation of MDMS8**

165 Survival analyses were performed to understand how the molecular disease subgroups  
166 relate to clinical outcome. Eleven of the disease subgroups share a progression-free survival  
167 (PFS) and overall survival (OS) similar to standard risk patients (Figure 3) (29). In contrast,  
168 patients in MDMS8 display significantly poorer outcomes (median PFS, 19 months, log-rank  
169  $p < 0.001$ ; median OS, 38 months, log-rank  $p < 1 \times 10^{-6}$ ) (Figure 3). MDMS8 has enrichment for ISS  
170 III patients (Fisher exact test  $p < 0.05$ ) and biallelic *TP53* (Fisher exact test  $p < 0.05$ ) (Figure 2,  
171 Supplementary Table S3). Moreover, among patients in MDMS8 carrying previously described  
172 high-risk markers in MM, including t(4;14), t(14;16), gain1q, del13q and del17p, both PFS and  
173 OS are significantly worse than among patients with similar genomic characteristics in non-  
174 MDMS8 clusters (Figure 4). Separate analyses for each of these high-risk markers, showed  
175 similar results, suggesting the presence of a common biology across these different genomic  
176 groups in addition to their high-risk features contribute to overall clinical outcome  
177 (Supplementary Figure S4A-E).

178 In MDMS8 patients, DNA repair/damage related genes, such as *ARID2*, apoptosis  
179 related *BIRC2*, *TRAF1*, *TRAF2* (30, 31), and genes associated with CDK function, including



180 *MAX*, *RB1*, and *TP53* (32, 33), are significantly mutated. Differential GE analysis identified  
181 significant activation of genes controlling mitotic and DNA damage/repair processes (*CENPI*,  
182 *SKA1*, *NUF2*, *PLK1*, *AURKB*, *BIRC5* and *BUB1*), DNA synthesis (*POLA1*, *PRIM1* and *PRIM2*),  
183 and checkpoints (*MCM/CDC/RFC* gene families and *CDK1/2*)-all generally involved in cell cycle  
184 related pathways (Figure 5A). A differential gene expression analysis comparing patients with  
185 shared genomic characteristics (including t(4;14) or gain1q) in MDMS8 versus non-MDMS8  
186 patients shows DNA repair, mitotic, checkpoint and *MYC* pathways significantly up regulated in  
187 MDMS8 (Supplementary Figures S4A-B).

188 The genomes of MDMS8 samples present an increased loss of genes on various  
189 chromosomes, including 1, 13, 14, 16 and 17 on the p arm (Figure 1 and top panel of Figure 5B)  
190 compared to the other molecular subgroups. We calculated the number of genomic cytobands  
191 containing a deletion and the total amount of genomic deletion in all samples (measured by the  
192 extent of deletion as percentage of the whole genome), which showed a significantly increased  
193 number of genomic regions having a loss in MDMS8 (median > 8% of genomic loss (Methods))  
194 compared to the rest of the patients (median < 4% of genomic loss) (t.test p.val < 1e-6, bottom  
195 panel Figure 5B). A gene set variant analysis (GSVA, see methods) on DNA damage/repair  
196 pathways (including REACTOME and DNA Damage Response (DDR) pathways (55)) showed a  
197 significant up-regulation of REACTOME DNA damage and repair pathways, as well as the DDR  
198 Homology-dependent recombination (HDR), Translesion Synthesis (TLS) and Base Excision  
199 Repair pathways in MDMS8 compared to the other NDMM patients (Figure 5C, Supplementary  
200 Figure S5).

201 To explore the prevalence of MDMS8 in other MM datasets, we built a GE classifier on  
202 the discovery data, applied it to independent cohorts (including IFM (5) and APEX (15, 35)  
203 (Supplementary Figure 6A), and UAMS (17) (Figure 6)), and explored prevalence and genomic  
204 properties (when available) of patients classified as 'MDMS8-like' (Supplementary Figure 6B).

205 We generated a multiclass linear model classifier with lasso regression for feature selection  
206 based on gene expression, since it was the common datatype available across the datasets.  
207 The trained classifier comprised a linear model on the expression of 35 genes (Supplementary  
208 Table S4). The training performance of the classifier for MDMS8 has a recall ~80% and  
209 precision of 75% (where false positives were mostly patients from MDMS9 and MDMS10)  
210 (Supplementary Table S5). Information on the training performance of the classifier for all  
211 clusters is shown in Supplementary Table S5, with a median recall of 60% and precision of  
212 64%; where most of the mis-classified calls happened between HY groups. Application of the  
213 classifier to the IFM dataset (Supplementary Table S3) identified a MDMS8-like group with  
214 similar prevalence (~12%) and significantly poorer OS (median OS not reached, long rank  $p <$   
215  $1e-4$ ) (left panel of Supplementary Figure S6A). Importantly, the MDMS8-like group in IFM also  
216 presented the high rate of genomic loss (median genomic loss MDMS8-like  $>8\%$  and rest  $< 4\%$ ,  
217 Supplementary Figure S6B), validating not only the gene expression profile but also the  
218 genomic features. We applied the classifier to the APEX trial Affymetrix-based GEP dataset  
219 (RRMM) (15, 35), where, again, there was a significant difference in OS observed between  
220 MDMS8-like versus other RRMM patients (right panel of Supplementary Figure S6A).  
221 Prevalence of the MDMS8-like segment in the APEX trial was  $<15\%$ . This analysis  
222 demonstrates that MDMS8-like segment is reproducible across multiple datasets and that its  
223 poor OS is independent of treatment regimen.

## 224 **MDMS8 Comparison to Previously Reported MM Subgroups and High-risk Signatures** 225 **and Biomarkers**

226 To place our analysis in the context of previous efforts, we explored similarities and  
227 differences between MDMS8 and other MM subgroups identified using GE datasets by Zhan et  
228 al (15) and Broyl et al (16). In Figure 6 (and Supplementary Figure S7) MDMS8 shows a  
229 significant enrichment in the signature scores of the publicly described PR (proliferative), MS

230 (MMSET) and MF (MAF) groups, which is coherent with MDMS8 since it contains t(4;14)  
231 patients (MS group), t(14;16) patients (MF group) and it shows dysregulation of cell cycle (PR  
232 group). Conversely, Zhan et al groups are associated with multiple MDMS clusters, suggesting  
233 no 1:1 association between the two clustering approaches. We also applied our classifier to the  
234 Zhan et al GEP discovery dataset and compared our cluster calls to theirs. This comparison,  
235 again, shows commonalities among some of the groups, such as the HY (hiperdiploid) from  
236 Zhan et al which contains most of our MDMS3 and MDMS5, while CD2 maps uniquely to  
237 MDMS12; but it also shows clear differences, including MDMS4 (which from our genomics data  
238 is HY) which doesn't associate to the previously defined HY group. Also, MF and MS groups are  
239 subdivided into various MDMSs. Finally, MDMS8, presents a transversal profile to the  
240 previously defined GEP subgroups (containing patients from MF, MS, MY and PR) suggesting  
241 the biology of this group is more heterogeneous than what was previously described  
242 (Supplementary Table S6). While both attempts (Zhan et al and ours) are unsupervised in  
243 nature, results show key differences between using GE only vs multi-omics integrative approach.  
244 Comparison of MDMS8 with the CNV clusters defined by Walker et al (19) identifies significant  
245 enrichment of CN7 (characterized by gain1q and del13q); however, the CN7 cluster does not  
246 include all of the MDMS8 patients, notably excluding those with t(4;14).

247 UAMS70 (3) and EMC92 (4) high-risk MM classifiers were applied to the discovery  
248 dataset to explore the overlap between patients deemed high-risk by these outcome-based  
249 classifiers and MDMS8 patients. MDMS8 captures a significant number of high-risk patients  
250 identified by both EMC92 (34%) and UAMS70 (40%). A third of MDMS8 patients, however,  
251 were not captured by these high-risk GE-classifiers (Supplementary Figure S8). Discordance  
252 among these groups is not unexpected, given that the number of shared genes between  
253 UAMS70 and EMC92 signatures is <5%. Moreover, unlike the GE-classifiers, the unsupervised  
254 approach used to identify MDMS8 was not based on clinical outcome.

## 255 **Master Regulators Drive Transcriptional Phenotype in MDMS8**

256 Finally, a master regulator (MR) analysis using msVIPER (36) was performed to  
257 elucidate the mechanisms linking genomic alterations to the transcriptional profiles of MDMS8.  
258 The master regulator genes were selected on the basis of impact on transcriptional changes of  
259 their inferred downstream targets (regulons) using a context-specific gene regulatory model  
260 (37). Ten MRs were identified (Figure 7 and Supplementary Figure S9), with seven of them  
261 showing positive activation in MDMS8: *E2F2*, a transcription factor member of the e2f family;  
262 *CKS1B*, a protein kinase regulator located in 1q21; *RBL1*, which encodes a gene that is similar  
263 in sequence and possibly function to retinoblastoma 1 (*RB1*), significantly mutated in MDMS8;  
264 *PRKDC*, a protein kinase sensor for DNA damage incurred in DNA repair/recombination;  
265 *RUSC1*, related to the Trk receptor signaling mediated by the MAPK pathway; *NUP93*,  
266 described as tumor growth modulator via cell proliferation and actin cytoskeleton remodeling  
267 (38) and migration and invasion capacity of cancer cells (39), and *MSN*, Moesin, described as  
268 an unfavorable prognostic biomarker in various cancers (40-42). Genes encoding the two zinc  
269 finger proteins (*ZBTB40* and *ZNF837*) and the histone deacetylase 3 (*HDAC3*) were down-  
270 regulated MRs (Supplementary Figure S9).

271 An enrichment analysis based on the regulons of MDMS8 MR was performed to  
272 understand MDMS8 biology and signaling functions controlled by these MRs. Most of the  
273 activated MRs control diverse biological processes (Figure 7) including ones related to mitosis,  
274 such as the *E2F2* regulon, which contains the *KIF* family, and the *CKS1B* regulon with *RAD21*  
275 and the *MCM* family; or the *MSN* regulon, associated with Rho GTPases (switches that regulate  
276 the actin cytoskeleton, influence cell polarity, microtubule dynamics, membrane transport  
277 pathways and transcription factor activity (43)). Cell cycle and DNA repair pathways in MDMS8  
278 appear to be controlled by *RBL1*, *NUP93* and *PRKDC*, although genes in the *PRKDC* regulon  
279 are involved also in spliceosome and RNA transport pathways, consistent with MDMS8 biology.

280 Regulons downstream of the negatively activated MRs were not significantly associated with  
281 any specific signaling pathways, although they contained previously defined tumor suppressor  
282 genes, such as *KDM4A* (44) and *E2F4* (45). Of the MRs, the specific roles of PRKDC and  
283 RBL1 and their regulons in DNA damage/repair would be consistent with supporting the  
284 maintenance of MDMS8 myeloma cell's loss of genetic material.

## 285 **Discussion**

286 In this study, we describe molecular segmentation of NDMM by a joint modeling of  
287 multiple omics data types to identify common latent variables to group patient samples into  
288 biologically distinct disease subtypes. Our unsupervised analysis identifies twelve biological  
289 subgroups of MM, confirming hyperdiploidy-dependent and SV-dependent as the two  
290 predominant molecular subtypes of MM. Notably, we identified and replicated a new disease  
291 segment (MDMS8) that is enriched in diverse known high-risk genomic features, accompanied  
292 by various MM driver mutations and dysregulation of DNA damage and repair pathways and cell  
293 cycle/mitotic processes, alongside a genome loss, that had not been previously described in  
294 MM. Master regulator analyses identified potential drivers of the transcriptional program pointing  
295 to key pathways in DNA repair, cell proliferation, cell cycle progression and chromosomal  
296 stability and maintenance. PFS and OS are significantly inferior for patients in MDMS8  
297 compared with patients in non-MDMS8 subgroups, even when patients in both cohorts carry the  
298 same high-risk genomic biomarkers, including 1q gain, del17p, t(4;14) and/or t(14;16). Our  
299 analysis shows for the first time that along with the different high risk markers (del17p, t(4;14),  
300 amp1q) in ndMM there is a common transcriptional program linked to the accumulation of  
301 genome loss in a subset of those tumors. In our estimation, the identification of MDMS8 by the  
302 integration of multiple data-types enabled a transversal and improved molecular description of  
303 high risk MM biology over previous GE-based or CN-based approaches. Not surprisingly, due to

304 its association with poor clinical outcome, MDMS8 contains a significant number of patients  
305 picked up by gene expression based high-risk classifiers, EMC92 (4) and UAMS70 (3). Besides,  
306 our integrated clustering analyses separate t(4;14) MM samples into multiple disease  
307 subgroups, including MDMS10 and MDMS8, all with high MMSET/NSD2 expression  
308 independent of the disease segment. The outcome and transcriptomic profile of MDMS8,  
309 however, are distinctly different from patients with t(4;14) in other disease subgroups,  
310 suggesting that overexpression of MMSET/NSD2 per se does not play a direct role in high-risk  
311 biology as had been previously discussed in the literature. While additional work is needed to  
312 tease out the implications of such observations, taken together, our results suggest that an  
313 integrated analysis of multiple data types could effectively sort out the heterogeneity of t(4;14)  
314 myeloma.

315 Identification of MDMS8, and its genomic loss linked with the dysregulated  
316 transcriptional phenotype prompted our exploration of functional drivers. The mechanism of the  
317 genome loss or its association with high-risk genetic loci is not clear at this time. Gene set  
318 enrichment analysis however revealed the relationship between MDMS8 transcription profiles  
319 with DNA repair/damage and cell cycle pathways, especially those directing the mitotic  
320 machinery and steps required for functional cell division. We envision that MDMS8 cells have  
321 adaptive mechanisms to tolerate excess DNA damage. It is likely that these transcriptional  
322 pathways are critical for repairing DNA damage as a consequence of DNA replication or  
323 induced to relieve the stress of multiple steps of proper chromosomal segregation during  
324 mitosis. All 7 MRs whose activities are up-regulated in MDMS8 are essential genes in MM,  
325 controlling key biological functions required for DNA repair/damage, cell cycle check points for  
326 G1/S and G2/M, MYC-driven growth and survival pathways and mitotic processes. This analysis  
327 provides a pool of proteins to potentially target the underlying biological basis of the aggressive  
328 nature of the disease. Similar approaches in other cancers (24) have suggested possible

329 synthetic lethal relationships between MRs which could provide novel combination approaches  
330 for therapeutics development in high-risk MM. These efforts could be combined or  
331 complemented with targeting the dysregulated DNA damage repair pathways.

332 In conclusion, this work presents an integrative clustering-derived molecular classification of  
333 Multiple Myeloma using key genetic features with the transcriptome. We find a molecular  
334 segment enriched in extensive DNA loss, accompanied by upregulated DNA damage repair and  
335 cell cycle/mitotic pathways. This integrative analysis also illustrates that this type of approach  
336 could improve our understanding of the disease heterogeneity of Multiple Myeloma by studying  
337 the individual molecular segment such as MDMS8.

338

## 339 **Methods**

### 340 **Data processing**

341 **Gene expression:** RNA extraction, library preparation and sequencing for both MMRF  
342 CoMMpass and IFM/DFCI were previously described by Walker et al (19) and  
343 <https://research.themmr.org>.

344 **BAM to FastQ file conversion for MMRF CoMMpass cohort:** Previously aligned BAM files  
345 were collected from database of Genotypes and Phenotypes (dbGaP) and converted to FASTQ  
346 using Picard tools v2.1.1 to extract read sequences and base quality scores.

347 **Quantification:** FASTQ files from both cohorts were quantified using Salmon. Isoform level  
348 expressions were quantified with Quasi-mapping using GRCh38 cDNA reference genome from  
349 Gencode v24. Gene level abundances were calculated using tximport and isoform level TPM  
350 (transcript per million) estimates for each sample.

351 **Affymetrix gene expression:** GE data coming from Affymetrix HG-U133 Plus 2 were  
352 normalized using EdgeR (46) package available in CRAN.

353 **Scaling gene level expressions and selecting high variable genes:** GE was normalized for  
354 each sample against three housekeeping genes. 11 housekeeping genes (47) were originally  
355 tested and the top 3 genes with lowest standard deviation were selected. Geometric mean of  
356 these 3 housekeeping genes (NONO, PGK1 and VPS29) was used to scale gene level  
357 expressions.

358 **Calling copy number variants:** preprocessing for copy number analysis has been described  
359 previously Walker et al (19). Genomic loss was calculated in each sample adding all the length  
360 of all the subgroups with a “loss” call from control-freec output (including both homozygous and  
361 heterozygous deletions). The final proportion of genomic loss is calculated per patient using size  
362 of genomic loss previously calculated over the genome size.

363 **SNV data:** SNVs were called and preprocessed as previously described (19). After  
364 preprocessing, only missense mutations that were observed in  $\geq 3\%$  of the patients were kept  
365 for further analysis.

366 **SV data:** SVs were called and preprocessed as previously described (19). Lowly prevalent SVs  
367 might be under-represented in our dataset due to size limitations.

## 368 **Clustering**

369 Two different clustering algorithms iCluster+ (26) and the Cluster of Clusters Algorithm (COCA)  
370 by the Cancer Genome Atlas Research Network (27) that integrate multiple OMICs data types  
371 with different approaches were run with a range of parameters to identify the combination which  
372 produced the most robust and stable clusters across our dataset. The number of clusters  
373 ranged between 2 and 20, and the optimal solution was selected based on Bayesian



374 Information Criteria (BIC). Membership consistency across iterations was used to select  
375 iCluster+ as the final clustering approach. More information can be found in the Supplementary  
376 Methods File.

### 377 **Biomarker Analysis**

378 **Differential Gene Expression:** Voom-LIMMA was run for GE analysis, using linear models to  
379 assess differential expression in the context of multifactor designed experiments (49). It was  
380 implemented in the *limma* package for Bioconductor (<http://www.bioconductor.org>) and applied  
381 to test differential relative abundance between conditions for each cluster independently.  
382 Significance p-values were corrected for multiple testing by the false-discovery method and  
383 deemed significant at an FDR threshold of 0.05 (5%) (50).

384 **Pathway Analysis:** Gene-set enrichment analysis (GSEA (51)) was applied to rank relative  
385 abundance ratios obtained during differential analysis for each comparison. Weighted  
386 enrichment statistic calculations were used instead of the classic unweighted ranking to account  
387 for fold change differences in addition to protein ranking. Gene categories assessed for  
388 enrichment corresponded to the canonical pathway collection (e.g. Reactome, Biocarta, KEGG)  
389 obtained from the *MSigDB* database (file: c2.cp.v5.2.symbols (52)). Enrichment p-values were  
390 corrected for multiple testing by FDR.

391 **Signature Enrichment Analysis:** GSVA R package was used to calculate enrichment analysis  
392 of the various signatures. For UAMS70 (3) and EMC92 analysis, thresholds were refined to  
393 RNAseq data to select respectively 15% and 20% of the population with the highest scores.

394 **Identification of master regulators:** Master regulator analysis was performed using the  
395 msVIPER algorithm in the VIPER R package. More information can be found in the  
396 Supplementary Methods File.

397 **Classifier:** we utilized the glmnet package in CRAN ([https://cran.r-](https://cran.r-project.org/web/packages/glmnet/index.html)  
398 [project.org/web/packages/glmnet/index.html](https://cran.r-project.org/web/packages/glmnet/index.html)) to estimate a multinomial elastic net  
399 model regression model with cross validation. The features were selected by estimating models  
400 with 100 nfolds on the top 3813 genes by coefficient of variance across all datasets. 42 genes  
401 identified across the cross-validation iterations were included in the final model. In order to  
402 make all the MM datasets comparable, they were normalized together with voom/limma and  
403 dataset bias was removed with Combat R function (53). Finally, all datasets were scaled  
404 independently by genes to median=0 and standard variation = 1.

405 **Statistical analyses:** various statistical tests from the stats v3.5.3 R (54) CRAN package were  
406 used to check significance of the association of the subgroups to different variables. Fisher's  
407 exact test for binary data (mutations/CNVs), t-test for continuous variables (GE pathway  
408 scores), and global log-rank test for outcome (PFS/OS).

#### 409 **Data Availability**

410 Sequencing data were deposited in the European Genome Archive under accession  
411 EGA00001001147 and EGA00001000036 or at database of Genotypes and Phenotypes  
412 (dbGAP) under accession phs000748.v5.p4.

#### 413 **Code Availability**

414 Our genomic pipeline code is provided under [https://github.com/celgene-research/mgp\\_ngs](https://github.com/celgene-research/mgp_ngs).

415 Methods used for analysis are publicly available.

416

#### 417 **Acknowledgements**

418 The authors acknowledge continued support for MGP from colleagues at BMS, especially  
419 Dorothy Fallows, Rupert Vessey, Douglas Bassett, Amit Agarwal and the Myeloma Disease  
420 Strategy Team.

421

## 422 **Authorship Contributions**

423 The project was conceived and designed by AT. Funding acquisition by EF and AT. Project  
424 administration by MO, FT and EF. Oversight and management of resources (data generation,  
425 collection, transfer, infrastructure, data processing) by EF, FT, MS, BW, NM, HA-L, AT, GJM.  
426 Analyses and interpretation were designed and performed by MO, FT, MT, NS, MS, EF, IJ, KW,  
427 BW, PV, HA-L, GJM, NM, AT. Data visualization performed by MO, MS, and FT. Supervision  
428 and scientific direction provided by AT. The manuscript was written by MO, MS, FT, EF, AT.

## 429 **Disclosure of Conflicts of Interest**

430 BMS Corporation: Employment, Equity Ownership: MO, FT, NS, IJ, KW, MT, EF, and AT.  
431 Funding for data processing and storage provided by BMS Corporation. No disclosures or  
432 conflicts of interest relevant to this work for authors other than what is listed above.

## 433 **References**

- 434 1. Corre J, Munshi N, Avet-Loiseau H. Genetics of multiple myeloma: another  
435 heterogeneity level? *Blood*. 2015;125(12):1870-6.
- 436 2. Morgan GJ, Walker BA, Davies FE. The genetic architecture of multiple  
437 myeloma. *Nat Rev Cancer*. 2012;12(5):335-48.
- 438 3. Shaughnessy JD, Jr., Zhan F, Burington BE, Huang Y, Colla S, Hanamura I, et  
439 al. A validated gene expression model of high-risk multiple myeloma is defined by  
440 deregulated expression of genes mapping to chromosome 1. *Blood*. 2007;109(6):2276-  
441 84.

- 442 4. Kuiper R, Broyl A, de Knecht Y, van Vliet MH, van Beers EH, van der Holt B, et al.  
443 A gene expression signature for high-risk multiple myeloma. *Leukemia*.  
444 2012;26(11):2406-13.
- 445 5. Magrangeas F, Nasser V, Avet-Loiseau H, Loricod B, Decaux O, Granjeaud S, et  
446 al. Gene expression profiling of multiple myeloma reveals molecular portraits in relation  
447 to the pathogenesis of the disease. *Blood*. 2003;101(12):4998-5006.
- 448 6. Chung TH, Mulligan G, Fonseca R, Chng WJ. A novel measure of chromosome  
449 instability can account for prognostic difference in multiple myeloma. *PloS one*.  
450 2013;8(6):e66361.
- 451 7. Chng WJ, Braggio E, Mulligan G, Bryant B, Remstein E, Valdez R, et al. The  
452 centrosome index is a powerful prognostic marker in myeloma and identifies a cohort of  
453 patients that might benefit from aurora kinase inhibition. *Blood*. 2008;111(3):1603-9.
- 454 8. Hose D, Reme T, Hielscher T, Moreaux J, Messner T, Seckinger A, et al.  
455 Proliferation is a central independent prognostic factor and target for personalized and  
456 risk-adapted treatment in multiple myeloma. *Haematologica*. 2011;96(1):87-95.
- 457 9. Chng WJ, Chung TH, Kumar S, Usmani S, Munshi N, Avet-Loiseau H, et al.  
458 Gene signature combinations improve prognostic stratification of multiple myeloma  
459 patients. *Leukemia*. 2016;30(5):1071-8.
- 460 10. Samur MK, Minvielle S, Gulla A, Fulciniti M, Cleynen A, Aktas Samur A, et al.  
461 Long intergenic non-coding RNAs have an independent impact on survival in multiple  
462 myeloma. *Leukemia*. 2018;32(12):2626-35.

- 463 11. Walker BA, Mavrommatis K, Wardell CP, Ashby TC, Bauer M, Davies F, et al. A  
464 high-risk, Double-Hit, group of newly diagnosed myeloma identified by genomic  
465 analysis. *Leukemia*. 2019;33(1):159-70.
- 466 12. Thakurta A, Ortiz M, Blecua P, Towfic F, Corre J, Serbina NV, et al. High  
467 subclonal fraction of 17p deletion is associated with poor prognosis in multiple  
468 myeloma. *Blood*. 2019;133(11):1217-21.
- 469 13. Palumbo A, Avet-Loiseau H, Oliva S, Lokhorst HM, Goldschmidt H, Rosinol L, et  
470 al. Revised International Staging System for Multiple Myeloma: A Report From  
471 International Myeloma Working Group. *Journal of clinical oncology : official journal of*  
472 *the American Society of Clinical Oncology*. 2015;33(26):2863-9.
- 473 14. Greipp PR, San Miguel J, Durie BG, Crowley JJ, Barlogie B, Blade J, et al.  
474 International staging system for multiple myeloma. *Journal of clinical oncology : official*  
475 *journal of the American Society of Clinical Oncology*. 2005;23(15):3412-20.
- 476 15. Zhan F, Huang Y, Colla S, Stewart JP, Hanamura I, Gupta S, et al. The  
477 molecular classification of multiple myeloma. *Blood*. 2006;108(6):2020-8.
- 478 16. Broyl A, Hose D, Lokhorst H, de Knecht Y, Peeters J, Jauch A, et al. Gene  
479 expression profiling for molecular classification of multiple myeloma in newly diagnosed  
480 patients. *Blood*. 2010;116(14):2543-53.
- 481 17. Laganà A, Perumal D, Melnekoff D, Readhead B, Kidd BA, Leshchenko V, et al.  
482 Integrative network analysis identifies novel drivers of pathogenesis and progression in  
483 newly diagnosed multiple myeloma. *Leukemia*. 2018;32(1):120-30.

- 484 18. Hoang PH, Cornish AJ, Dobbins SE, Kaiser M, Houlston RS. Mutational  
485 processes contributing to the development of multiple myeloma. *Blood cancer journal*.  
486 2019;9(8):60.
- 487 19. Walker BA, Mavrommatis K, Wardell CP, Ashby TC, Bauer M, Davies FE, et al.  
488 Identification of novel mutational drivers reveals oncogene dependencies in multiple  
489 myeloma. *Blood*. 2018;132(6):587-97.
- 490 20. Berger AC, Korkut A, Kanchi RS, Hegde AM, Lenoir W, Liu W, et al. A  
491 Comprehensive Pan-Cancer Molecular Study of Gynecologic and Breast Cancers.  
492 *Cancer cell*. 2018;33(4):690-705 e9.
- 493 21. Robertson AG, Kim J, Al-Ahmadie H, Bellmunt J, Guo G, Cherniack AD, et al.  
494 Comprehensive Molecular Characterization of Muscle-Invasive Bladder Cancer. *Cell*.  
495 2017;171(3):540-56 e25.
- 496 22. Cancer Genome Atlas Research N, Linehan WM, Spellman PT, Ricketts CJ,  
497 Creighton CJ, Fei SS, et al. Comprehensive Molecular Characterization of Papillary  
498 Renal-Cell Carcinoma. *The New England journal of medicine*. 2016;374(2):135-45.
- 499 23. Papaemmanuil E, Gerstung M, Bullinger L, Gaidzik VI, Paschka P, Roberts ND,  
500 et al. Genomic Classification and Prognosis in Acute Myeloid Leukemia. *The New*  
501 *England journal of medicine*. 2016;374(23):2209-21.
- 502 24. Califano A, Alvarez MJ. The recurrent architecture of tumour initiation,  
503 progression and drug sensitivity. *Nat Rev Cancer*. 2017;17(2):116-30.

- 504 25. Lim WK, Lyashenko E, Califano A. Master regulators used as breast cancer  
505 metastasis classifier. *Pacific Symposium on Biocomputing Pacific Symposium on*  
506 *Biocomputing*. 2009:504-15.
- 507 26. Mo Q, Wang S, Seshan VE, Olshen AB, Schultz N, Sander C, et al. Pattern  
508 discovery and cancer gene identification in integrated cancer genomic data.  
509 *Proceedings of the National Academy of Sciences of the United States of America*.  
510 2013;110(11):4245-50.
- 511 27. Koboldt D, Fulton RS, McLellan MD, Schmidt H, Kalicki-Veizer J, McMichael JF,  
512 et al. Comprehensive molecular portraits of human breast tumours. *Nature*.  
513 2012;490(7418):61-70.
- 514 28. Morgan GJ, He J, Tytarenko R, Patel P, Stephens OW, Zhong S, et al. Kinase  
515 domain activation through gene rearrangement in multiple myeloma. *Leukemia*.  
516 2018;32(11):2435-44.
- 517 29. Binder M, Rajkumar SV, Ketterling RP, Dispenzieri A, Lacy MQ, Gertz MA, et al.  
518 Substratification of patients with newly diagnosed standard-risk multiple myeloma. *Br J*  
519 *Haematol*. 2019;185(2):254-60.
- 520 30. Wang CY, Mayo MW, Korneluk RG, Goeddel DV, Baldwin AS, Jr. NF-kappaB  
521 antiapoptosis: induction of TRAF1 and TRAF2 and c-IAP1 and c-IAP2 to suppress  
522 caspase-8 activation. *Science (New York, NY)*. 1998;281(5383):1680-3.
- 523 31. Xiong Y, Ren YF, Xu J, Yang DY, He XH, Luo JY, et al. Enhanced external  
524 counterpulsation inhibits endothelial apoptosis via modulation of BIRC2 and Apaf-1

- 525 genes in porcine hypercholesterolemia. *International journal of cardiology*.  
526 2014;171(2):161-8.
- 527 32. Arcellana-Panlilio MY, Egeler RM, Ujack E, Magliocco A, Stuart GC, Robbins  
528 SM, et al. Evidence of a role for the INK4 family of cyclin-dependent kinase inhibitors in  
529 ovarian granulosa cell tumors. *Genes Chromosomes Cancer*. 2002;35(2):176-81.
- 530 33. Fiorentino FP, Tokgün E, Solé-Sánchez S, Giampaolo S, Tokgün O, Jauset T, et  
531 al. Growth suppression by MYC inhibition in small cell lung cancer cells with TP53 and  
532 RB1 inactivation. *Oncotarget*. 2016;7(21):31014-28.
- 533 34. Chng WJ, Dispenzieri A, Chim CS, Fonseca R, Goldschmidt H, Lentzsch S, et al.  
534 IMWG consensus on risk stratification in multiple myeloma. *Leukemia*. 2014;28(2):269-  
535 77.
- 536 35. Richardson PG, Sonneveld P, Schuster MW, Irwin D, Stadtmauer EA, Facon T,  
537 et al. Bortezomib or high-dose dexamethasone for relapsed multiple myeloma. *The New*  
538 *England journal of medicine*. 2005;352(24):2487-98.
- 539 36. Alvarez MJ, Shen Y, Giorgi FM, Lachmann A, Ding BB, Ye BH, et al. Functional  
540 characterization of somatic mutations in cancer using network-based inference of  
541 protein activity. *Nature genetics*. 2016;48(8):838-47.
- 542 37. Alvarez MJ, Subramaniam PS, Tang LH, Grunn A, Aburi M, Rieckhof G, et al. A  
543 precision oncology approach to the pharmacological targeting of mechanistic  
544 dependencies in neuroendocrine tumors. *Nature genetics*. 2018;50(7):979-89.



- 545 38. Bersini S, Lytle NK, Schulte R, Huang L, Wahl GM, Hetzer MW. Nup93 regulates  
546 breast tumor growth by modulating cell proliferation and actin cytoskeleton remodeling.  
547 Life Science Alliance. 2020;3(1):e201900623.
- 548 39. Ouyang X, Hao X, Liu S, Hu J, Hu L. Expression of Nup93 is associated with the  
549 proliferation, migration and invasion capacity of cervical cancer cells. Acta biochimica et  
550 biophysica Sinica. 2019;51(12):1276-85.
- 551 40. Barros FBA, Assao A, Garcia NG, Nonogaki S, Carvalho AL, Soares FA, et al.  
552 Moesin expression by tumor cells is an unfavorable prognostic biomarker for oral  
553 cancer. BMC Cancer. 2018;18(1):53.
- 554 41. Yu L, Zhao L, Wu H, Zhao H, Yu Z, He M, et al. Moesin is an independent  
555 prognostic marker for ER-positive breast cancer. Oncology letters. 2019;17(2):1921-33.
- 556 42. Wang Q, Lu X, Wang J, Yang Z, Hoffman RM, Wu X. Moesin Up-regulation Is  
557 Associated with Enhanced Tumor Progression Imaged Non-invasively in an Orthotopic  
558 Mouse Model of Human Glioblastoma. Anticancer research. 2018;38(6):3267-72.
- 559 43. Etienne-Manneville S, Hall A. Rho GTPases in cell biology. Nature.  
560 2002;420(6916):629-35.
- 561 44. Jin F, Kumar S, Dai Y. The Lysine-Specific Demethylase KDM4A/JMJD2A Acts  
562 As a Tumor Suppressor in Multiple Myeloma. Blood. 2018;132 (Supplement 1)  
563 Abstract(191).
- 564 45. Feng Y, Li L, Du Y, Peng X, Chen F. E2F4 functions as a tumour suppressor in  
565 acute myeloid leukaemia via inhibition of the MAPK signalling pathway by binding to  
566 EZH2. Journal of cellular and molecular medicine. 2020;24(3):2157-68.

- 567 46. Robinson MD, McCarthy DJ, Smyth GK. edgeR: a Bioconductor package for  
568 differential expression analysis of digital gene expression data. *Bioinformatics* (Oxford,  
569 England). 2010;26(1):139-40.
- 570 47. Yang C, Pan H, Liu Y, Zhou X. Stably expressed housekeeping genes across  
571 developmental stages in the two-spotted spider mite, *Tetranychus urticae*. *PloS one*.  
572 2015;10(3):e0120833.
- 573 48. Gaffney SG, Townsend JP. PathScore: a web tool for identifying altered  
574 pathways in cancer data. *Bioinformatics* (Oxford, England). 2016;32(23):3688-90.
- 575 49. Law CW, Chen Y, Shi W, Smyth GK. voom: Precision weights unlock linear  
576 model analysis tools for RNA-seq read counts. *Genome Biol*. 2014;15(2):R29.
- 577 50. Benjamini Y, Hochberg Y. Controlling the False Discovery Rate: A Practical and  
578 Powerful Approach to Multiple Testing. *Journal of the Royal Statistical Society: Series B*  
579 (Methodological). 1995;57(1):289-300.
- 580 51. Subramanian A, Tamayo P, Mootha VK, Mukherjee S, Ebert BL, Gillette MA, et  
581 al. Gene set enrichment analysis: a knowledge-based approach for interpreting  
582 genome-wide expression profiles. *Proceedings of the National Academy of Sciences of*  
583 *the United States of America*. 2005;102(43):15545-50.
- 584 52. Liberzon A, Subramanian A, Pinchback R, Thorvaldsdottir H, Tamayo P, Mesirov  
585 JP. Molecular signatures database (MSigDB) 3.0. *Bioinformatics* (Oxford, England).  
586 2011;27(12):1739-40.

587 53. Leek JT, Johnson WE, Parker HS, Jaffe AE, Storey JD. The sva package for  
588 removing batch effects and other unwanted variation in high-throughput experiments.  
589 Bioinformatics (Oxford, England). 2012;28(6):882-3.

590 54. Team RDC. R: a language and environment for statistical computing. R  
591 Foundation for Statistical Computing. 2011;1:409.

592 55. Knijnenburg TA, Wang L, et al. Genomic and Molecular Landscape of DNA  
593 Damage Repair Deficiency across The Cancer Genome Atlas. Cell Reports. 2018;  
594 23(1):239-254.

595

596

597 **Figure Legends**

598 **Figure 1: Twelve multiple myeloma subgroups identified by integrative clustering. A)**

599 Figure representing a visual summary of the work presented in the paper. From NDMM

600 molecular profiles to identification of HR patient segment by multi-omics unsupervised clustering

601 and its main characteristics including genomic loss, master regulators and DNA repair and cell

602 cycle dysregulation. **B)** Heatmap showing molecular characteristics of the molecularly defined

603 myeloma subgroups (MDMS 1-12): Left panel shows copy number variants with structural

604 variants added as tracks above; middle panel shows gene expression (top 30 over-expressed

605 genes per MDMS without replication); and right panel shows single nucleotide variants (black

606 band denotes mutation, white band denotes wild-type sequence).

607

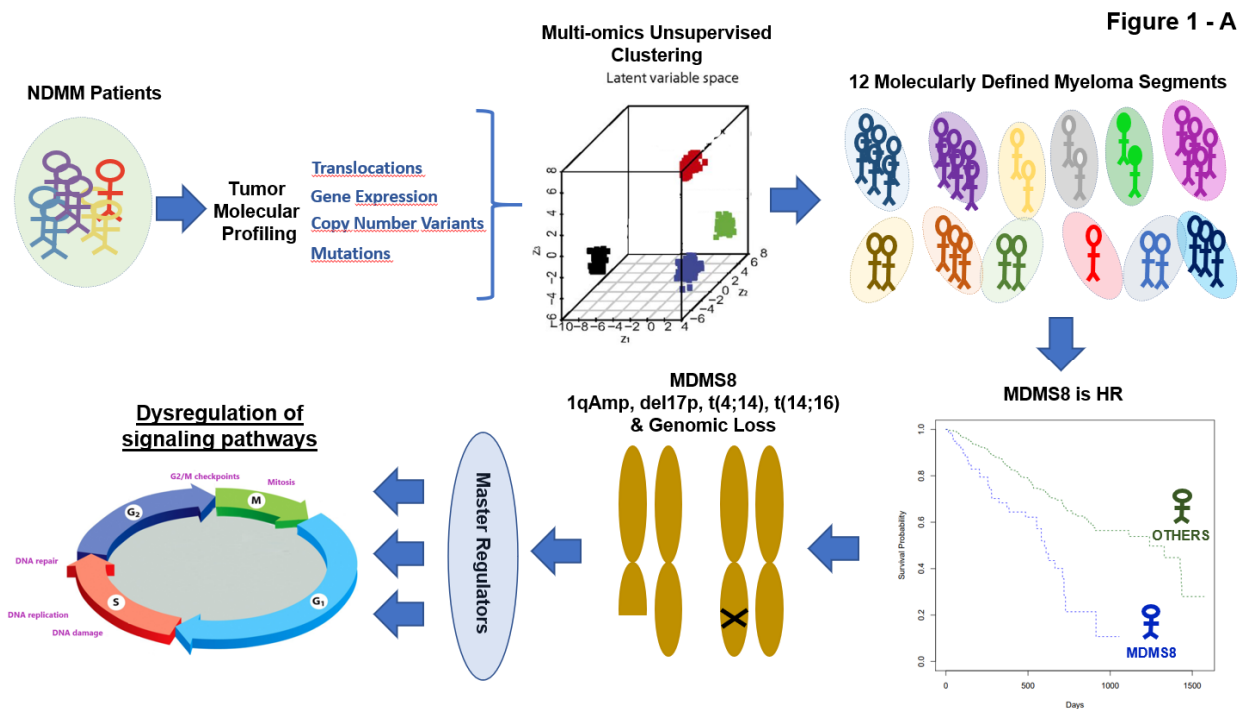

608

609

Figure 1 - B

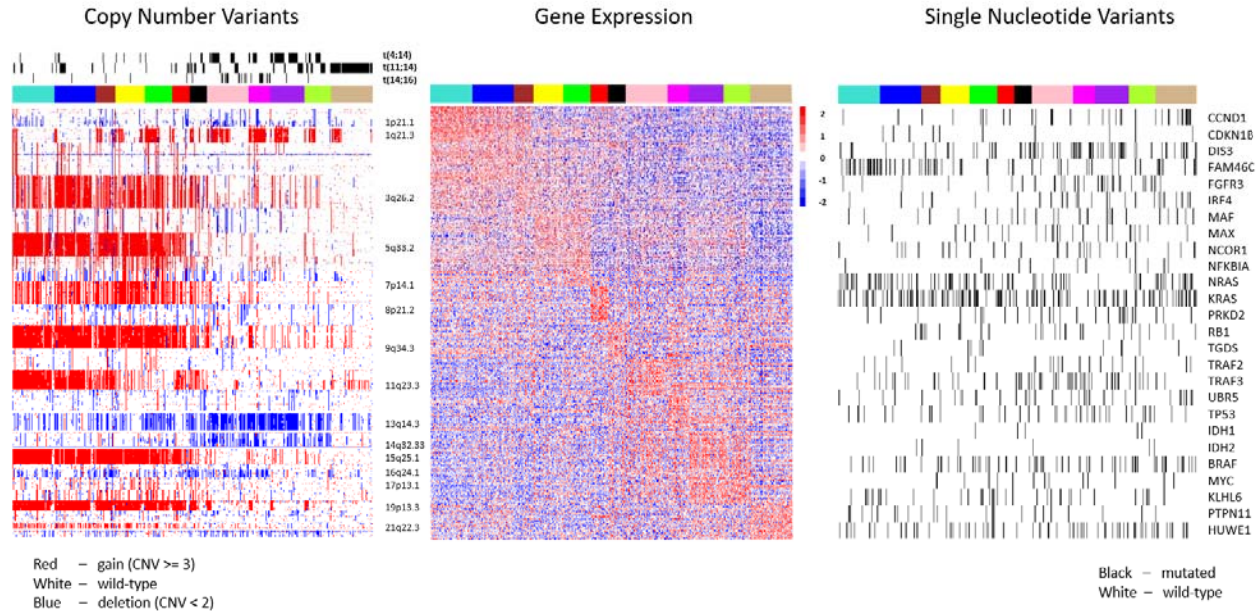

610

611

612 **Figure 2: Significant genomic, transcriptomic and clinical characteristics across disease**

613 **subgroups.** Enrichment scores [-log<sub>10</sub> (fdr), Fisher exact t test (binary values) or t test

614 (continuous values) p-values]. Red and blue colors represent positive and negative

615 associations, respectively. Values were trimmed between (-3, 3). Dot size corresponds with

616 level of significance.

Figure 2

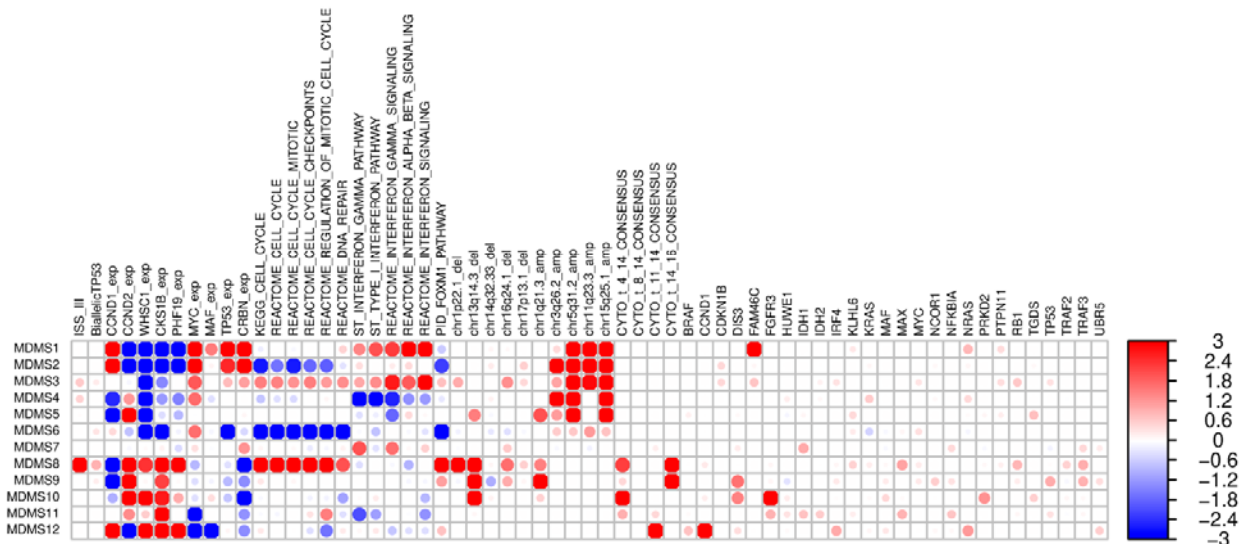

617

618 **Figure 3: Kaplan-Meier (KM) survival analysis of outcome among the disease subgroups**  
 619 **MDMS 1-12.** Progression-free survival (left) and overall survival (right) among patients in each  
 620 of the 12 myeloma subgroups. Global log-rank p-value shown for each KM plot.

Figure 3

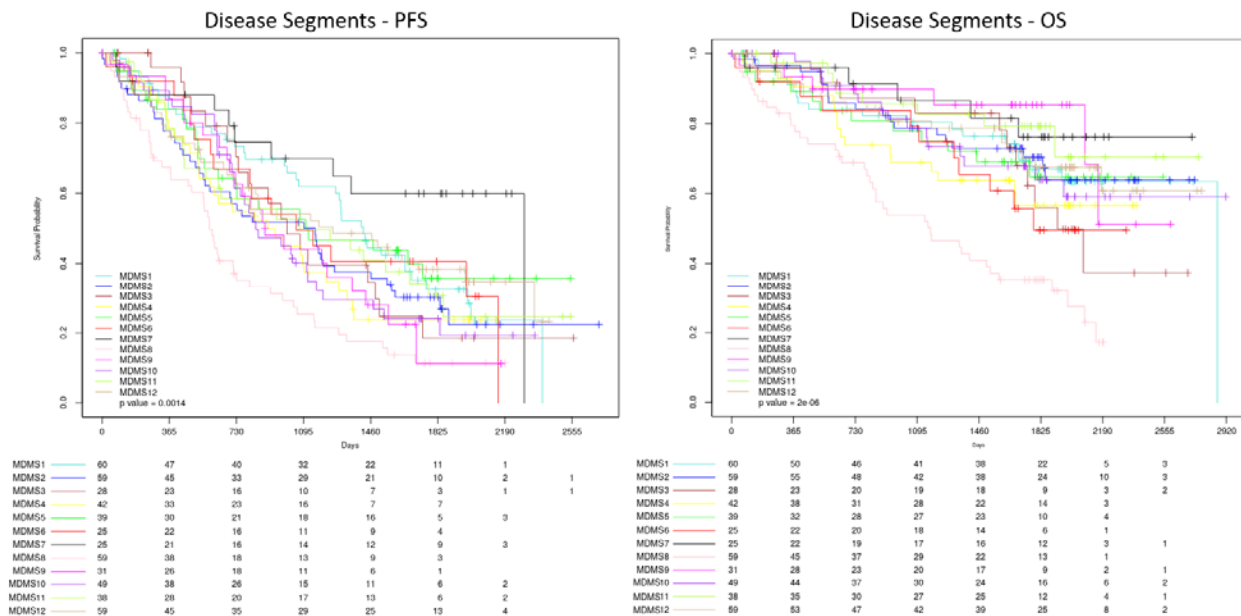

621

622

623

624 **Figure 4: Kaplan-Meier (KM) survival analysis of genomic subgroups versus MDMS8.** KM  
 625 survival analysis showing overall survival (OS) of patients carrying one or more of the following  
 626 genomic aberrations: [t(4;14), t(14;16), gain1q or del17p] versus the remaining patients (left);  
 627 overall survival (OS) of patients with genomic aberrations [t(4;14), t(14;16), gain1q or del17p] in  
 628 MDMS8 versus the same subset of patients in non-MDMS8 subgroups (middle); and  
 629 progression free survival (PFS) of patients with genomic aberrations [(t(4;14), t(14;16), gain1q  
 630 or del17p] in MDMS8 versus the same subset of patients in non-MDMS8 subgroups.

**Figure 4**

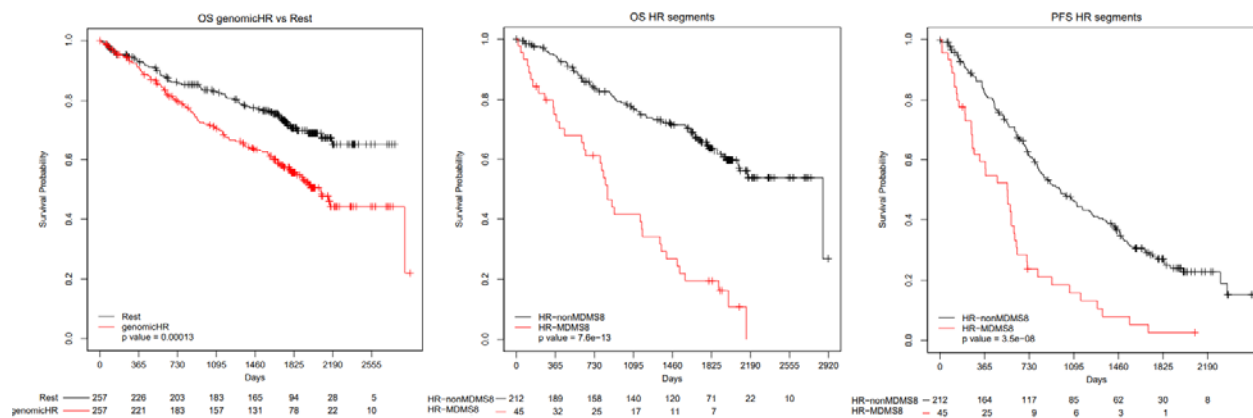

631

632

633



634 **Figure 5: Genomic and gene expression characteristics of MDMS8.** **A)** Signaling pathway  
635 network showing significantly up-regulated pathways in MDMS8 compared to the rest of the  
636 disease subgroups. **B)** Prevalence of deletions (negative Y-axis, blue) and gains (positive Y-  
637 axis, red) across the genome in MDMS8 (top panel). Percentage of genomic losses in MDMS8  
638 vs the rest of ndMM patients (bottom panel). **C)** Enrichment scores of the Reactome DNA repair  
639 pathway in MDMS8 vs the rest (left panel) and Homology-dependent Recombination (HDR)  
640 pathway in MDMS8 vs the rest (right panel).

Figure 5

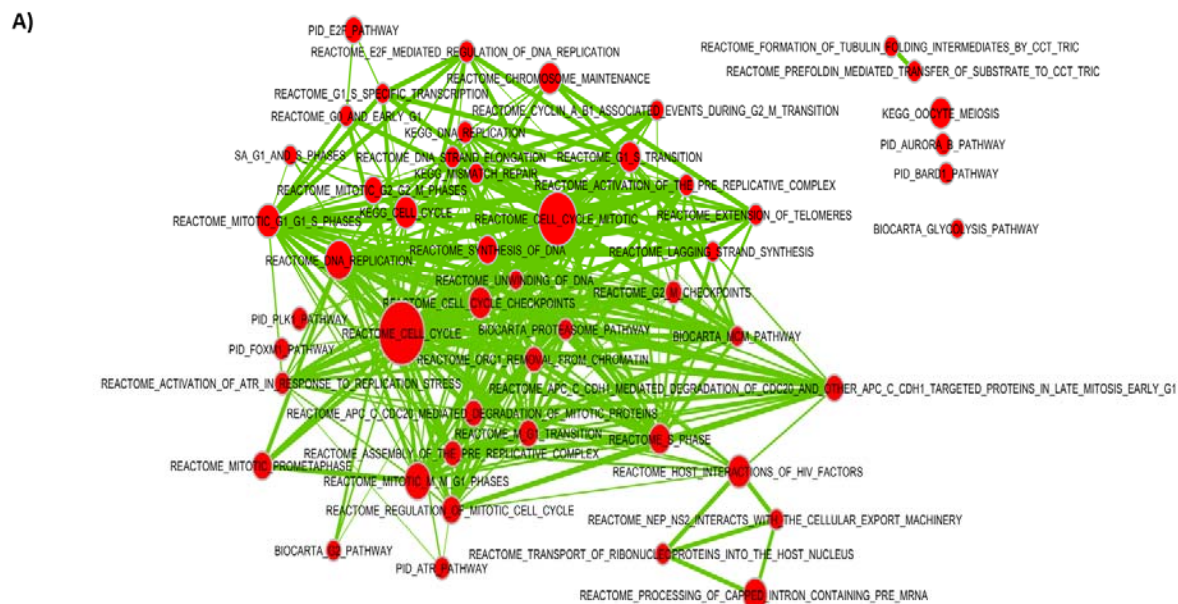

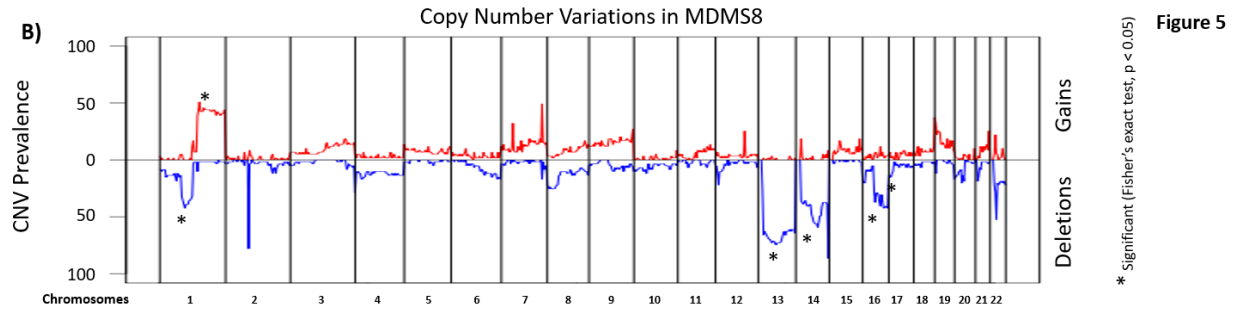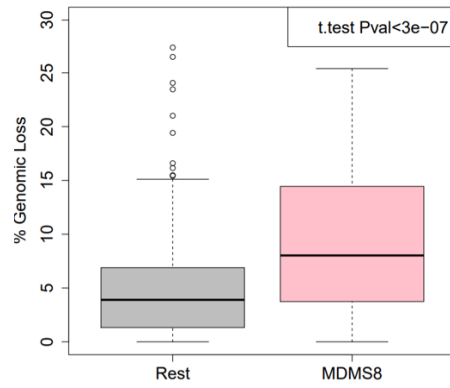

642

Figure 5

**C)**

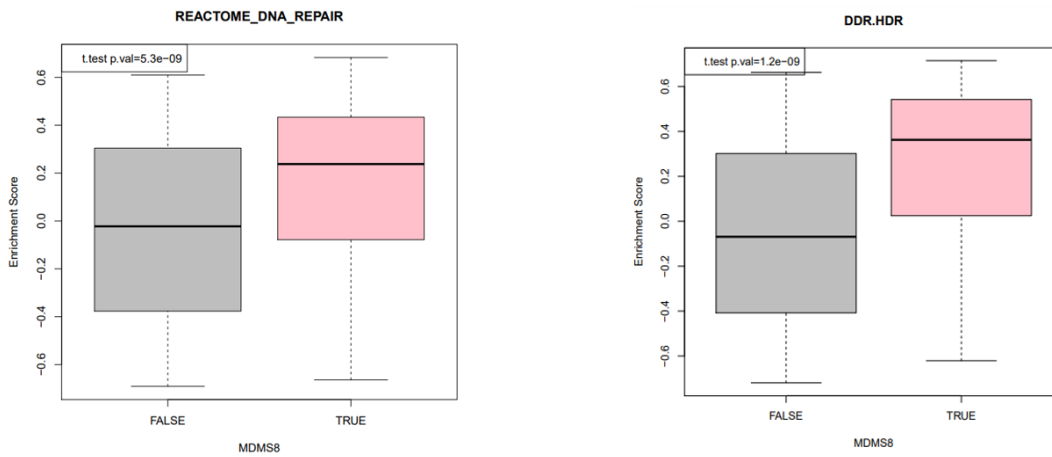

643

644

645 **Figure 6: Comparison of MDMS8 to other Gene Expression Signatures. A)** Gene  
646 expression enrichment of Zhan et al GE patient subgroups signatures (15) across the twelve  
647 molecularly defined myeloma subgroups. Red represents positive enrichment; blue represents  
648 negative enrichment. Blue squares highlight significant association (enrichment scores t-test  
649  $p < 0.01$ ) between the Zhan et al signatures and MDMS disease subgroups.

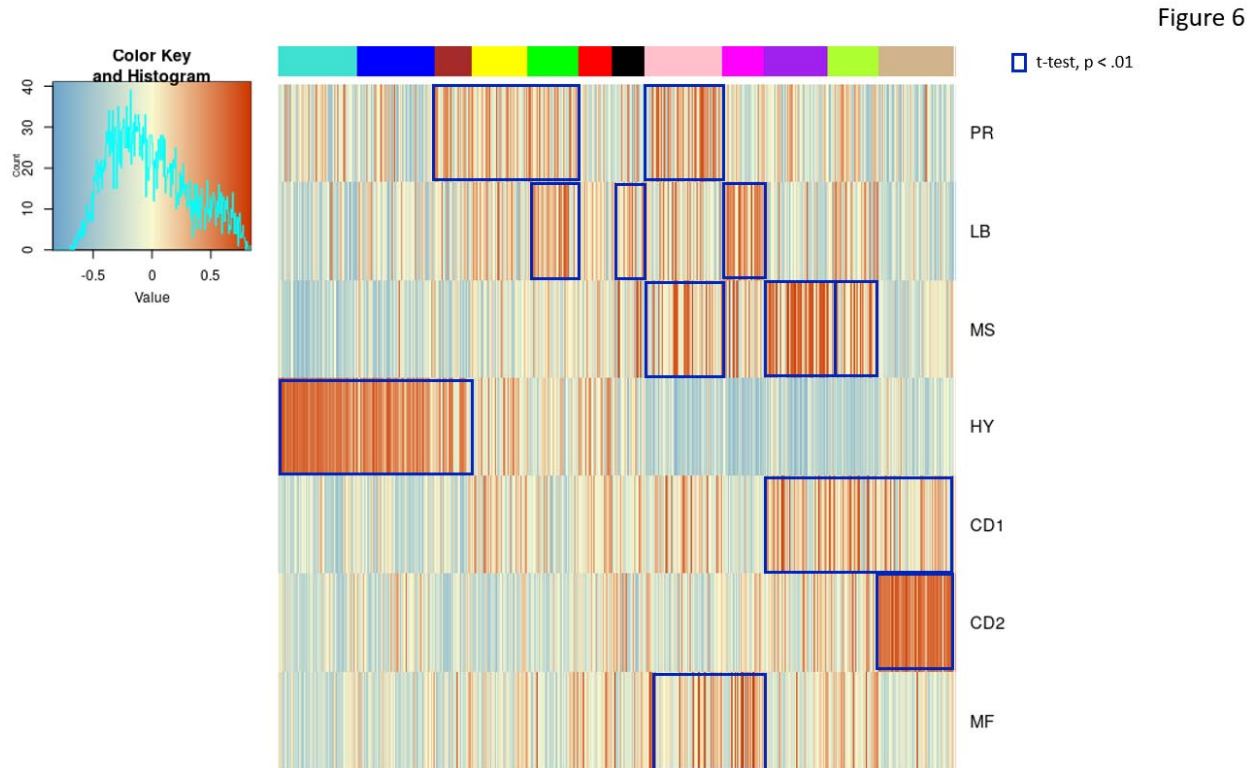

650

651

652

653 **Figure 7. Master regulator analysis.** Master regulators' regulons and their associated  
654 signaling pathways. Color scheme represents  $-\log_{10}$  (t test p-value) of activation score of the  
655 listed genes in MDMS8 versus the rest, with red for positive values and blue for negative values.  
656 Squares represent master regulators; circles represent regulon genes.  
657

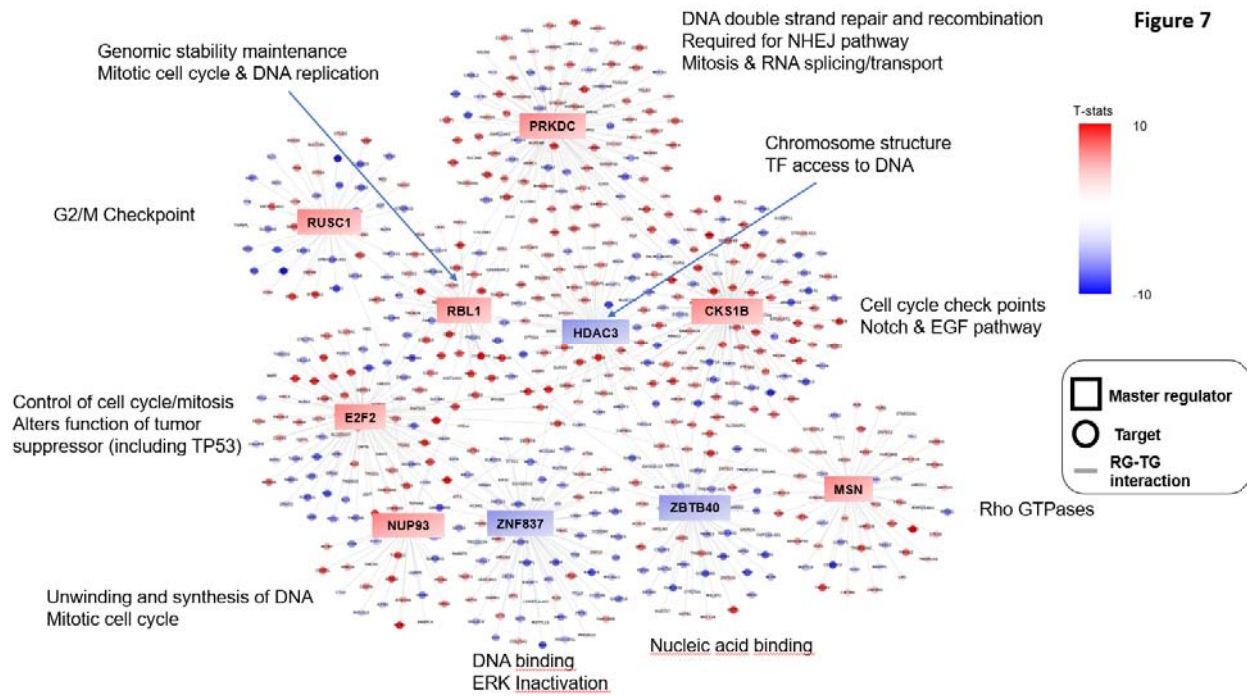

658
